1 ***In vivo* reprogramming of wound-resident cells generates skin with hair**

2 Yuta Moriwaki<sup>1</sup>, Shen Qi<sup>1</sup>, Hiroyuki Okada<sup>2</sup>, Du Zening<sup>1</sup>, Shogo Suga<sup>3</sup>, Motoi Kato<sup>1</sup>,

3 Takao Numahata<sup>1</sup>, Kexin Li<sup>1</sup>, Koji Kanayama<sup>1</sup>, Mutsumi Okazaki<sup>1</sup>, Yusuke Hirabayashi<sup>3</sup>,

4 Juan Carlos Izpisua Belmonte<sup>4</sup>, Hironori Hojo<sup>2</sup>, Masakazu Kurita<sup>1\*</sup>

5 **Affiliations:**

6 1. Department of Plastic and Reconstructive Surgery, The University of Tokyo Hospital,

7 7-3-1 Hongo, Bunkyo-ku, Tokyo, Japan.

8 2. Center for Disease Biology and Integrative Medicine, Graduate School of Medicine,

9 The University of Tokyo, 7-3-1 Hongo, Bunkyo-ku, Tokyo, 113-8655, Japan.

10 3. Department of Chemistry and Biotechnology, School of Engineering, The University

11 of Tokyo, Tokyo 113-8656, Japan.

12 4. Altos Labs, 5510 Morehouse Drive, Suite 300, San Diego, CA 92121, USA.

13

14 \*Correspondence: [kuritam-pla@h.u-tokyo.ac.jp](mailto:kuritam-pla@h.u-tokyo.ac.jp).

15

16

17 **Summary Paragraph**

18 **Mammalian skin appendages, such as hair follicles and sweat glands, are complex**  
19 **mini-organs formed during skin development<sup>1,2</sup>. As wounds heal, the resulting scar**  
20 **tissue lacks skin appendages. The clinical regeneration of skin appendages is an**  
21 **ongoing challenge<sup>3,4</sup>. Skin epithelial tissues have been regenerated *in vivo* by cellular**  
22 **reprogramming<sup>5,6</sup>, but the *de novo* generation of skin appendages has not previously**  
23 **been achieved. Here, we show that transplantation of a type of epithelial cell and two**  
24 **types of mesenchymal cells, reprogrammed from adult mouse subcutaneous**  
25 **mesenchymal cells to mimic developing skin cells, resulted in the generation of skin-**  
26 **appendage-like structures. Furthermore, with the development of a new AAV**  
27 **serotype, *in vivo* reprogramming of wound-resident cells with the same**  
28 **reprogramming factors generates skin with *de novo* appendages in adult mice. These**  
29 **findings may provide new therapeutic avenues for skin regeneration and frequent**  
30 **aging-associated skin appendage disorders, such as hair loss and dry skin, and may**  
31 **extend to other tissues and organs. This study also provides the potential for *de novo***  
32 **generation of complex organs *in vivo*.**

33

34

35 **Main**

36 After recent advances in cellular reprogramming<sup>5,6</sup>, we have developed a method to  
37 generate skin epithelial tissues by *in vivo* reprogramming of wound-resident  
38 mesenchymal cells with four transcription factors (*DNP63A*, *GRHL2*, *TFAP2A*, and  
39 *cMYC*), resulting in cells with the ability to form stratified epithelia, which we call  
40 induced stratified epithelium progenitors (DGTm-iSEPs)<sup>7</sup>. *De novo* epithelialization can  
41 be induced from the surface of an ulcer<sup>8</sup>, but no skin appendages were present in the  
42 regenerating skin. As skin appendages form during skin development<sup>1,2</sup>, we hypothesized  
43 that wound-resident adult mesenchymal cells could be reprogrammed to epithelial and  
44 mesenchymal cells similar to that of developing skin, thus generating skin with  
45 appendages *in situ*.

46

47 **Skin reconstitution assay**

48 To identify sets of direct reprogramming genes to generate cells capable of regenerating  
49 skin appendages, a traditional skin reconstitution assay<sup>9,10</sup> was used as the functional test.  
50 While the transplantation of mixtures of adult skin-derived epithelial cells (ASECs) and  
51 adult subcutaneous mesenchymal cells (ASMCs) into a silicone chamber attached to a  
52 skin ulcer generated on the back of immunodeficient mice<sup>11</sup> resulted in no skin appendage

53 regeneration (Fig. 1a), skin cells from E14.5 fetuses (embryonic skin cells, ESKCs)  
54 robustly regenerated skin appendages (Fig. 1b). Mixtures of neonatal skin epithelial cells  
55 (NSECs) and neonatal skin mesenchymal cells (NSMCs) resulted in moderately  
56 regenerated skin appendages (Fig. 1c).

57

### 58 **Reprogramming factors *in vitro***

59 First, we aimed to determine the genes that reprogram ASMCs to epithelial cells capable  
60 of reconstituting skin appendages with the help of NSMCs. The DGTm factors were  
61 tested first and were found to be insufficient for ASMCs to regenerate skin appendages  
62 (Fig. 1d). To confer developmental epithelial characteristics, *LEF1*, *FOXD1*, and *SHH*  
63 were tested as additional factors<sup>2,12,13</sup>. Epithelial cells were successfully induced with  
64 DGTm factors plus *LEF1* or *FOXD1*, while the addition of *SHH* prevented the induction  
65 of epithelial cells. Using a skin reconstitution assay, DGTmL-iSEPs (DGTm+*LEF1*-  
66 induced stratified epithelium progenitors) were found to reconstitute skin appendages  
67 together with NSMCs (Fig. 1e).

68 To determine the set of genes required for reprogramming adult mesenchymal cells to  
69 mesenchymal cells with the capacity for skin appendage reconstitution, ASMCs were  
70 processed and co-transplanted with DGTmL-iSEPs. Twenty fetal skin-associated genes

71 were listed as candidates<sup>2,14,15</sup> and assessed by transducing each candidate into human  
72 dermal fibroblasts (hDFs) and measuring the levels of the dermal papilla markers *PROM1*,  
73 *CRABPI*, and *VCAN* (Extended Data Fig. 1a). Eligible genes were further tested by  
74 measuring the alkaline phosphatase (ALP) expression on transduction of each gene singly  
75 and in combination (Extended Data Fig. 1b, c). Trial transplantations were done in parallel  
76 with no positive findings. However, with the addition of *PRDMI*<sup>15,16</sup> to one of the  
77 candidate combinations, *ETVI* and *FOXDI*, hair-follicle-like structures were found  
78 beneath the skin in the centre of the reconstituted area (Fig. 1f). To further approximate  
79 the local environment of developing skin, AMSCs transduced with *LEF1* and *SHH* were  
80 additionally transplanted as a third cell type<sup>17,18</sup>. Consequently, hair outgrowth was  
81 observed from a central location. A mature hair shaft, hair follicle, and structures similar  
82 to a sebaceous gland were confirmed histologically (Fig. 1g). To minimize the  
83 mesenchymal elements in terms of cell types and gene numbers, DGTML-iSEPs were  
84 transplanted with differential mesenchymal cells transduced with combinations of genes  
85 including *ETVI*, *FOXDI*, *PRDMI*, *LEF1*, and *SHH*, and the amount of hair outgrowth  
86 was evaluated. Despite substantial differences between the various combinations, the  
87 results indicated that the combination of *FOXDI+PRDMI*-transduced mesenchymal cells  
88 (FP-MCs) and *LEF1+SHH*-transduced mesenchymal cells (LS-MCs) conferred the

89 greatest amount of hair outgrowth (Fig. 1h).

90

### 91 **Contribution of reprogrammed cells**

92 To reveal the contribution of each cell type to skin appendages, DGTML-iSEPs, FP-MCs,  
93 and LS-MCs generated from GFP-mouse-derived ASMCs were co-transplanted with  
94 other unlabelled cells. In DGTML-iSEPs from GFP animals, the reconstituted area was  
95 identified as an uninterrupted GFP-positive surface with a clear border. The whole  
96 epithelial portion, including the skin appendages, consisted of GFP-positive DGTML-  
97 iSEPs (Fig. 2a). In FP-MCs or LS-MCs from GFP animals, the GFP-positive cells  
98 comprised the subcutaneous portion of the reconstituted skin area. ALP-positive cells  
99 localized in dermal papilla positions were partially GFP positive in both FP-MCs (Fig.  
100 2b) and LS-MCs from labelled animals (Fig. 2c). To further elucidate the role of cells  
101 from the recipient animal, non-labelled DGTML-iSEPs, FP-MCs, and LS-MCs were  
102 transplanted to GFP nude mice. GFP-positive recipient animal-derived cells could be  
103 found in the subcutaneous portion of the reconstituted skin area, but could not be detected  
104 in skin appendages (Fig. 2d). Thus, it was demonstrated that the core elements of  
105 regenerated skin appendages consisted of DGTML-iSEPs, FP-MCs, and LS-MCs.

106 To investigate whether *in vivo* reprogramming of wound-resident cells using DGTML,  
107 FP, and LS factors could induce *de novo* generation of skin with appendages, we  
108 employed an assay of isolated skin ulcers. We surgically removed skin from the back of  
109 mice to generate an ulcer and isolated the resulting wound from the surrounding skin  
110 using a skin chamber sutured to the deep fascia (Fig. 3a). Isolated wounds did not close  
111 in the absence of treatment since the migration of epithelial cells into the wound and  
112 contraction of the surrounding skin was prevented<sup>7</sup>.

113

#### 114 **Development of a new AAV capsid**

115 For *in vivo* gene transduction, we tested 18 wildtype and synthetic adeno-associated  
116 viral (AAV) capsids to analyse the cell type tropism between AAVs, and determined that  
117 AAVDJ (a serotype of the AAV capsid generated by DNA family shuffling<sup>19</sup>) was the  
118 most efficient for transducing cells in isolated ulcers. To develop an AAV capsid with  
119 increased efficiency and modified cell tropism, we applied *in vivo* directed evolution on  
120 an AAVDJ random peptide display library<sup>20</sup> and generated a new AAVDJ-variant capsid  
121 optimized for cells in isolated murine skin ulcers (AAVDJU) (Extended Data Fig. 2a–e).  
122 The AAVDJU virus was more efficient than the original AAVDJ virus when applied in

123 isolated ulcers, especially in deep tissues such as adipose and muscle tissues (Extended  
124 Data Fig. 3a–c).

125

## 126 **Reprogramming *in vivo***

127 We next applied DGTML-AAVDJUs (*DNP63A*-AAVDJU, *GRHL2*-AAVDJU, *TFAP2A*-  
128 AAVDJU, *cMYC*-AAVDJU, and *LEFI*-AAVDJU), followed by mixtures of FP-  
129 AAVDJs (*FOXD1*-AAVDJ and *PRDMI*-AAVDJ) and LS-AAVDJUs (*LEFI*-AAVDJU  
130 and *SHH*-AAVDJU) in our *in vivo* ulcer assay (Fig. 3b). We observed epithelia-like  
131 tissue inside the chamber around day 21 (Fig. 3c) and an outgrowth of a hair-like  
132 structure on day 28 (Fig. 3d) in one out of four animals (25%) in three independent  
133 series of experiments. Structures similar to hair follicles and sebaceous glands were  
134 confirmed in isolated epithelia on histological analysis (Fig. 3e).

135

136 In summary, direct reprogramming of wound-resident cells to multiple developing skin  
137 cells enables the generation of structures similar to skin appendages *in situ*. The  
138 emergence of skin appendages from an isolated wound, even without epithelial  
139 components, supports the feasibility of *de novo* complex organ generation *in vivo*. These  
140 findings pave the way toward new therapeutics in which all regions of the wound re-



141 epithelialize with skin appendages, relieving the spatial<sup>7</sup> and regenerative constraints  
142 observed during normal healing. An alternative supply of regenerative cells *in vitro* and  
143 *in vivo* might provide a new approach to frequent aging-associated skin appendage  
144 disorders, such as hair loss and dry skin. Our observations constitute an initial proof of  
145 principle for *in vivo* regeneration of three-dimensional complex tissue in mice. This  
146 knowledge might not only be useful for enhancing skin repair, but could also serve to  
147 guide *in vivo* regenerative strategies in other human pathological conditions in which  
148 tissue or organ homeostasis and repair are impaired.

149

## 150 REFERENCES

- 151 1. Millar, S. E. Molecular mechanisms regulating hair follicle development. *J. Invest.*  
152 *Dermatol.* **118**, 216–225 (2002). doi: 10.1046/j.0022-202x.2001.01670.x.
- 153 2. Sennett, R. et al. An integrated transcriptome atlas of embryonic hair follicle  
154 progenitors, their niche, and the developing skin. *Dev. Cell* **34**, 577–591 (2015). doi:  
155 10.1016/j.devcel.2015.06.023.
- 156 3. Lee, J. et al. Hair follicle development in mouse pluripotent stem cell-derived skin  
157 organoids. *Cell Rep.* **22**, 242–254 (2018). doi: 10.1016/j.celrep.2017.12.007.
- 158 4. Lee, J. et al. Hair-bearing human skin generated entirely from pluripotent stem cells.

- 159 *Nature* **582**, 399–404 (2020). doi: 10.1038/s41586-020-2352-3.
- 160 5. Takahashi, K. & Yamanaka, S. Induction of pluripotent stem cells from mouse  
161 embryonic and adult fibroblast cultures by defined factors. *Cell* **126**, 663–676 (2006).  
162 doi: 10.1016/j.cell.2006.07.024.
- 163 6. Srivastava, D. & DeWitt, N. In vivo cellular reprogramming: the next generation. *Cell*  
164 **166**, 1386–1396 (2016). doi: 10.1016/j.cell.2016.08.055.
- 165 7. Kurita, M. et al. In vivo reprogramming of wound-resident cells generates skin  
166 epithelial tissue. *Nature* **561**, 243–247 (2018). doi: 10.1038/s41586-018-0477-4.
- 167 8. Kurita, M., Izipisua Belmonte, J. C., Suzuki, K. & Okazaki, M. Development of de novo  
168 epithelialization method for treatment of cutaneous ulcers. *J. Dermatol. Sci.* **95**, 8–12  
169 (2019). doi: 10.1016/j.jdermsci.2019.06.006.
- 170 9. Yuspa, S. H., Morgan, D. L., Walker, R. J. & Bates, R. R. The growth of fetal mouse  
171 skin in cell culture and transplantation to F1 mice. *J. Invest. Dermatol.* **55**, 379–389  
172 (1970).
- 173 10. Worst P. K., Mackenzie, I. C. & Fusenig, N. E. Reformation of organized epidermal  
174 structure by transplantation of suspensions and cultures of epidermal and dermal cells.  
175 *Cell Tissue Res.* **225**, 65–77 (1982).
- 176 11. Du, Z. et al. Optimized 3D-printed template design for production of silicone skin

- 177 chambers. *J. Dermatol. Sci.* **105**, 55–57 (2022). doi: 10.1016/j.jdermsci.2021.11.006.
- 178 12. Abaci, H. E. et al. Tissue engineering of human hair follicles using a biomimetic  
179 developmental approach. *Nat. Commun.* **9**, 5301 (2018). doi: 10.1038/s41467-018-  
180 07579-y.
- 181 13. Greco, V. et al. A two-step mechanism for stem cell activation during hair regeneration.  
182 *Cell Stem Cell* **4**, 155–169 (2009). doi: 10.1016/j.stem.2008.12.009.
- 183 14. Ohyama, M., Kobayashi, T., Sasaki, T., Shimizu, A. & Amagai, M. Restoration of the  
184 intrinsic properties of human dermal papilla in vitro. *J. Cell Sci.* **125**, 4114–4125 (2012).  
185 doi: 10.1242/jcs.105700.
- 186 15. Ge, W. et al. Single-cell Transcriptome Profiling reveals Dermal and Epithelial cell  
187 fate decisions during Embryonic Hair Follicle Development. *Theranostics* **10**, 7581–7598  
188 (2020). Doi: 10.7150/thno.44306.
- 189 16. Driskell, R. R. et al. Distinct fibroblast lineages determine dermal architecture in skin  
190 development and repair. *Nature* **504**, 277–281 (2013). doi: 10.1038/nature12783.
- 191 17. Kratochwil, K., Dull, M., Farinas, I., Galceran, J. & Grosschedl, R. Lef1 expression  
192 is activated by BMP-4 and regulates inductive tissue interactions in tooth and hair  
193 development. *Genes Dev.* **10**, 1382–1394 (1996). Doi: 10.1101/gad.10.11.1382.
- 194 18. St-Jacques, B. et al. Sonic hedgehog signaling is essential for hair development. *Curr.*

- 195 *Biol.* **8**, 1058–1068 (1998). doi: 10.1016/s0960-9822(98)70443-9.
- 196 19. Grimm, D. et al. In vitro and in vivo gene therapy vector evolution via multispecies  
197 interbreeding and retargeting of adeno-associated viruses. *J. Virol.* **82**, 5887–5911 (2008).  
198 doi: 10.1128/JVI.00254-08.
- 199 20. Müller, O. J. et al. Random peptide libraries displayed on adeno-associated virus to  
200 select for targeted gene therapy vectors. *Nat. Biotechnol.* **21**, 1040–1046 (2003). doi:  
201 10.1038/nbt856.

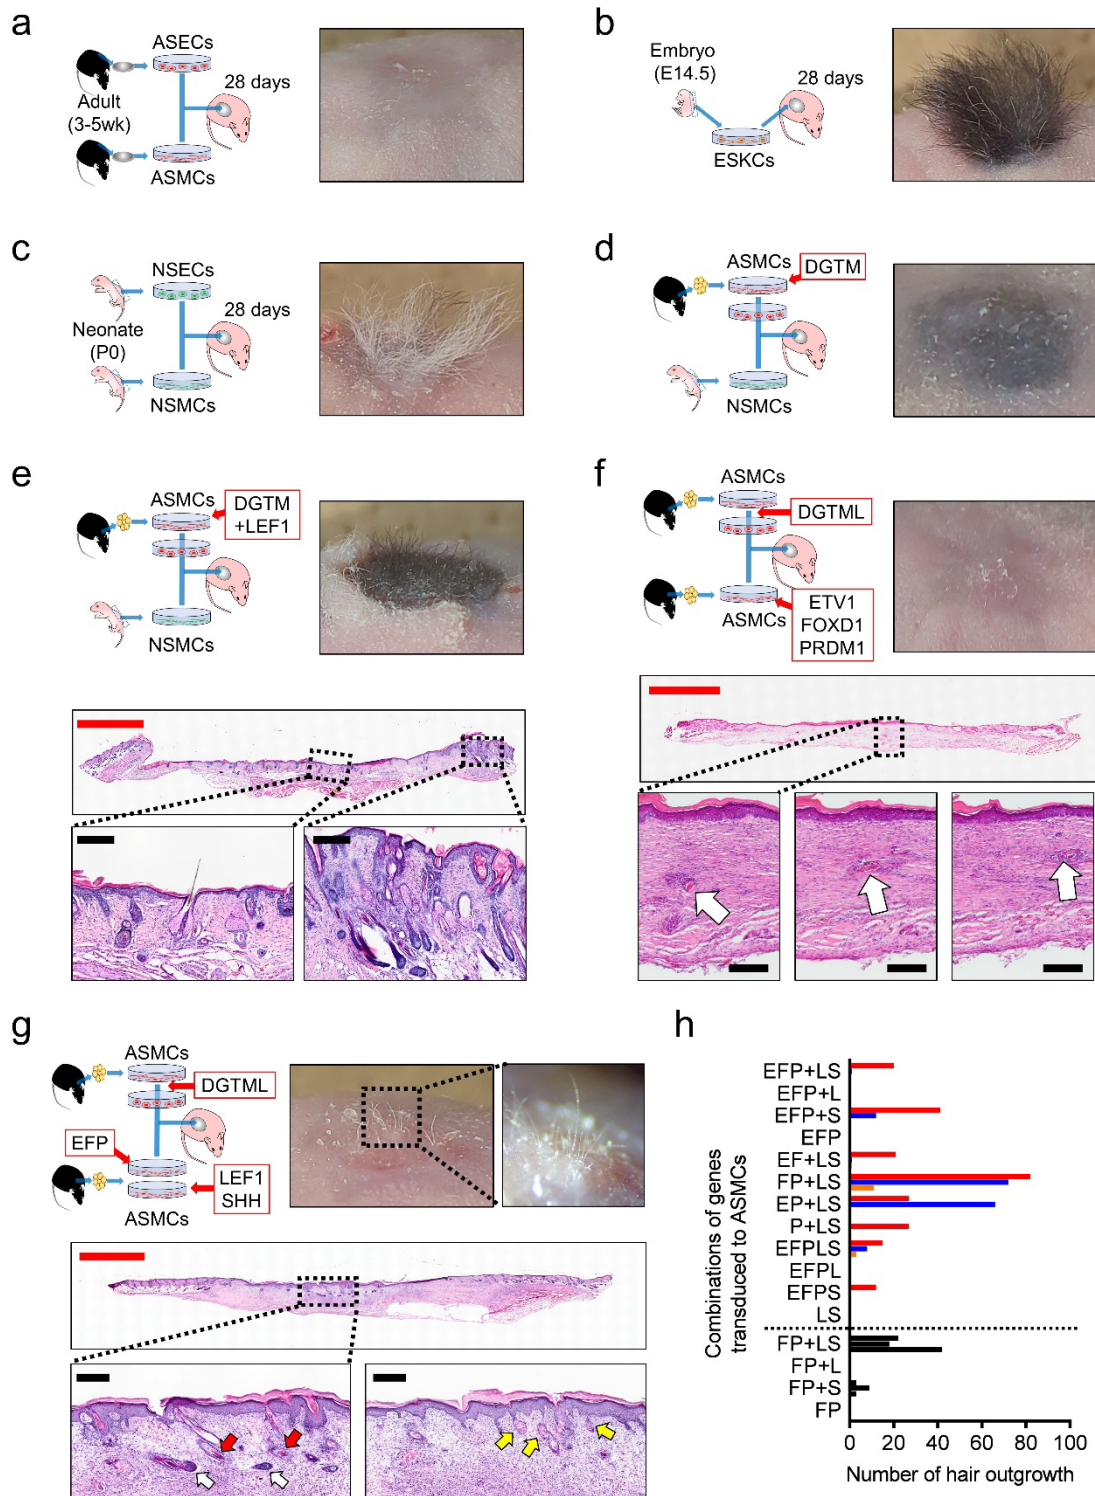

203 **Fig. 1: Identification of factors for induction of cells with the ability to form skin appendages.** **a**, Experimental design  
204 schematic and representative image of reconstituted skin after transplantation of ASECs and ASMCs into a skin chamber on the back of  
205 immunodeficient mice. No skin appendage regeneration was confirmed. n = 3, all similar results. **b**, Transplantation of ESKCs robustly  
206 regenerated skin appendages. n = 3, all similar results. **c**, Transplantation of NSECs and NSMCs moderately regenerated skin appendages.  
207 n = 3, all similar results. **d**, Transplantation of DGTML-iSEPs and NSMCs did not regenerate skin appendages. n = 3, all similar results. **e**,  
208 Transplantation of DGTML-iSEPs and NSMCs regenerated skin appendages. Haematoxylin and eosin (H&E) staining of sections through  
209 reconstituted areas of skin, showing hair follicles and sebaceous glands, similar to those of surrounding skin, in the central portion. Red  
210 scale bar, 2 mm; black scale bars, 200  $\mu$ m. n = 3, all similar results. **f**, Transplantation of DGTML-iSEPs and ASMCs transduced with *ETV1*,  
211 *FOXD1*, and *PRDM1*. A buried hair-follicle-like structure was histologically confirmed in the central portion. Arrows in serial magnified panels  
212 indicate mature hair shafts. Red scale bar, 2 mm; black scale bars, 200  $\mu$ m. n = 1. **g**, Transplantation of DGTML-iSEPs with two ASMCs  
213 transduced with *ETV1*, *FOXD1* and *PRDM1*, and *LEF1* and *SHH*, respectively, results in hair outgrowth. Histologically, skin appendages  
214 were confirmed in the central portion. Red arrows indicate mature hair shaft, white arrows indicate dermal papilla, and yellow arrows in the  
215 serial magnified panel indicate sebaceous glands. Red scale bar, 2 mm; black scale bars, 200  $\mu$ m. n = 3, all similar results. **h**, Amount of  
216 hair outgrowth after transplantation of DGTML-iSEPs and ASMCs transduced with combinations of genes (E, *ETV1*; F, *FOXD1*; P, *PRDM1*;  
217 L, *LEF1*; S, *SHH*). Different colour bars represent different series.

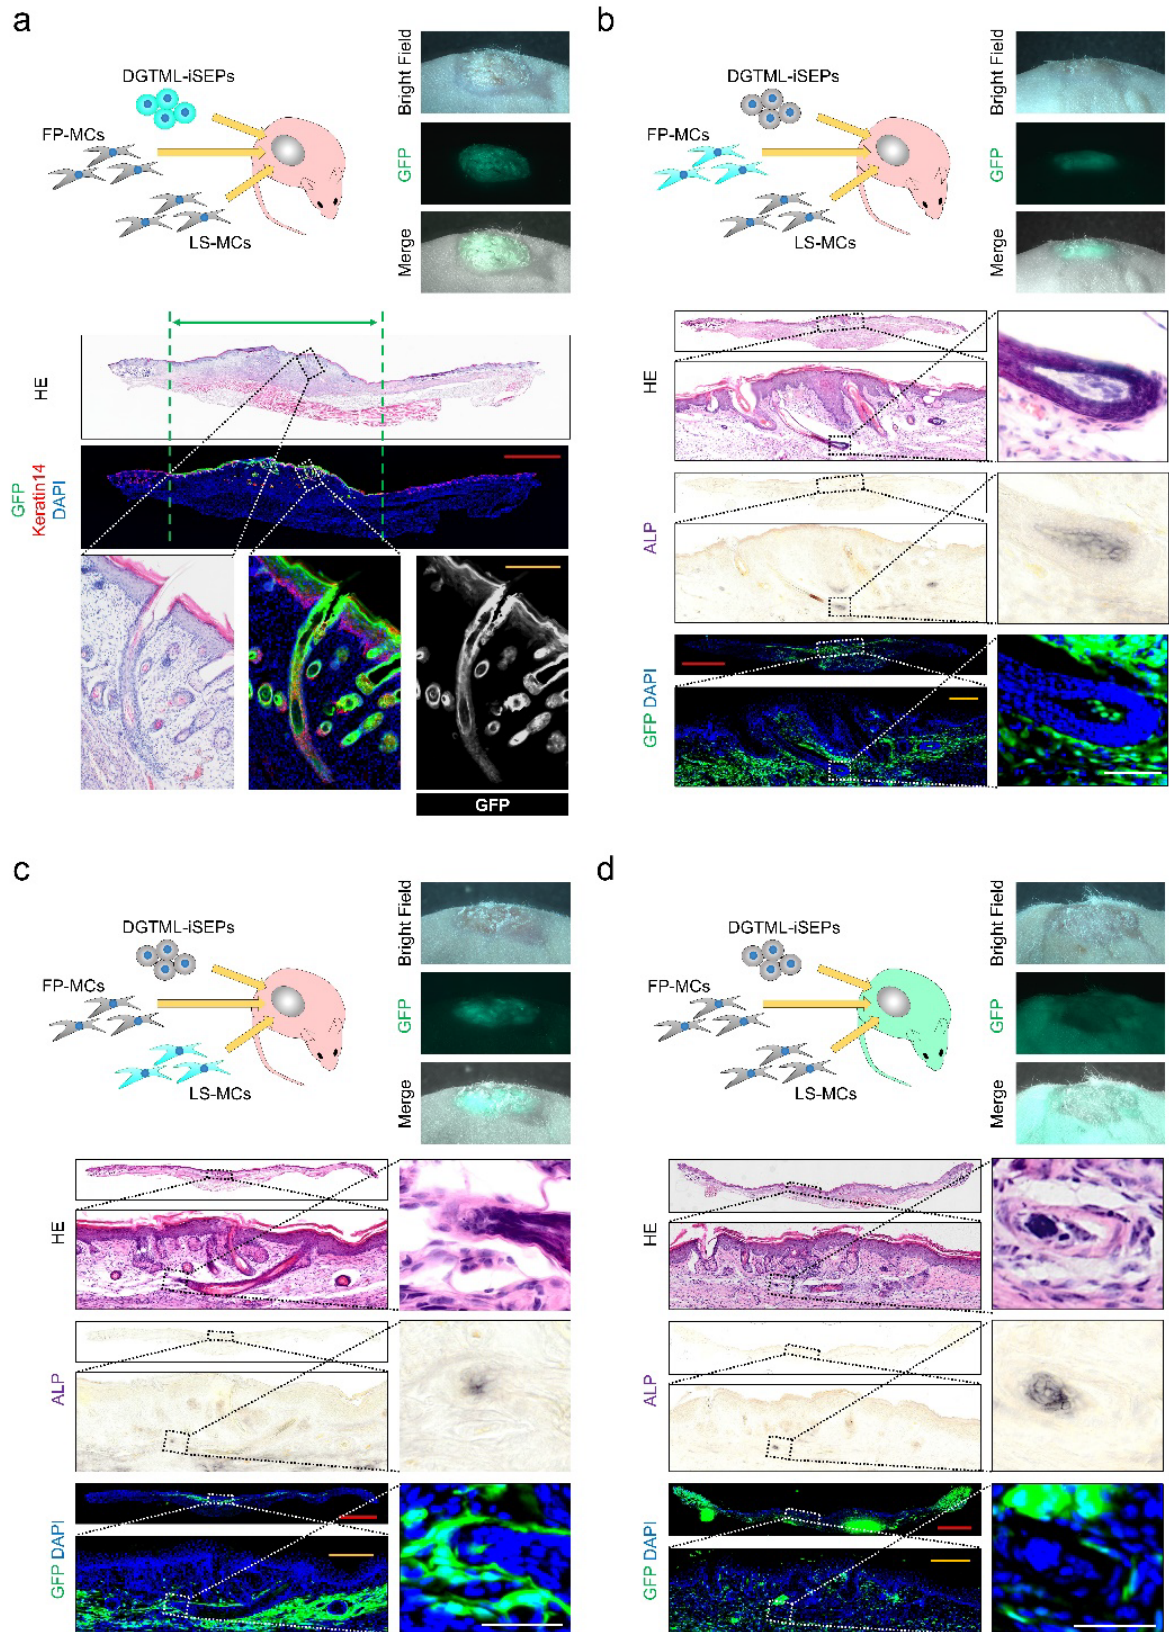

219

220 **Fig. 2: Induced cells contribute to skin appendages.** **a**, Experimental design schematic and representative stereoscopic and  
221 histological findings of DGTML-iSEP tracing experiments. The green arrow indicates the area of GFP-positive epithelial surface. Images  
222 are representative of three independent experiments. **b**, Experimental design schematic and representative stereoscopic and histological  
223 findings of FP-MC tracing experiments. FP-MCs reside in the ALP-positive dermal-papilla-positioned cell cluster. Images are representative  
224 of nine independent experiments. **c**, Experimental design schematic and representative stereoscopic and histological findings of LS-MC  
225 tracing experiments. FP-MCs reside in the ALP-positive dermal-papilla-positioned cell cluster. Images are representative of nine  
226 independent experiments. **d**, Experimental design schematic and representative stereoscopic and histological findings of recipient animal-  
227 derived cell tracing experiments. Recipient animal-derived cells were not detected in skin appendages. Images are representative of six  
228 independent experiments. **a–d**, Haematoxylin and eosin (HE), alkali phosphatase (ALP), and immunofluorescent images were obtained  
229 from the same specimen slice. Red scale bars, 2 mm; orange scale bars, 200  $\mu\text{m}$ ; white scale bars, 50  $\mu\text{m}$ .



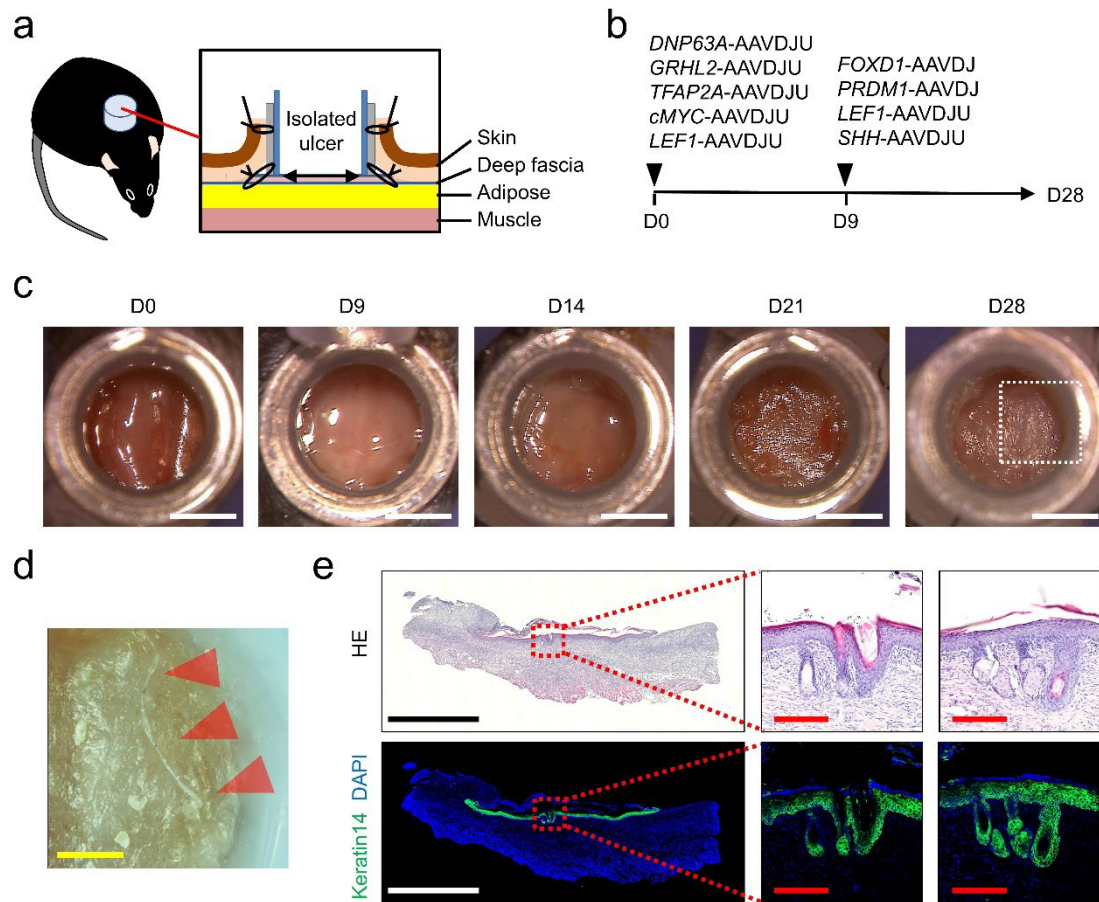

230

231 **Fig. 3: *In vivo* reprogramming of wound-resident cells to developing skin cells generates skin with appendages.**

232 **a**, Schematic of the skin chamber used for separating the ulcer from surrounding skin. **b**, Schedule of administration of reprogramming

233 factors using two types of adeno-associated viruses (AAVs). **c**, Representative appearances of ulcers treated by AAVs. Epithelial-like

234 structures were observed after day 21. Scale bars, 3 mm. (Similar findings in 1 of 4 animals in three independent experiments). **d**,

235 Stereoscopic image of epithelial surface. Arrows indicate outgrowth of a hair-like structure. Scale bars, 1 mm. **e**, Haematoxylin and eosin

236 (H&E) and immunohistochemical images of the same section through the root of the hair-like structure. A hair-follicle-like structure

237 (middle panels) and a sebaceous-gland-like structure (right panels) were observed in isolated epithelia. Black-and-white scale bars, 2

238 mm; red scale bars, 200  $\mu$ m.

239 **MATERIALS & METHODS**

240

241 **Isolation and culture of mouse adult skin-derived epithelial cells (ASECs)**

242 Back skin specimens were harvested from 3–5-week-old mice. The superficial portion

243 was collected in strip form with scissors, and was incubated with 0.25% trypsin and

244 0.02% ethylenediaminetetraacetic acid (EDTA) in PBS for 16–24 hours at 4°C. The

245 epidermis was separated from the dermis with forceps, and ASECs were isolated from

246 the dermis. ASECs were maintained on mitomycin C-treated 3T3-J2 feeder cells (a

247 generous gift from the late Dr Howard Green) in F medium (3:1 [v/v] Ham's F12

248 nutrient mixture:DMEM, high glucose (both from Life Technologies) supplemented

249 with 5% FBS, 0.4 µg/ml hydrocortisone (Sigma), 5 µg/ml insulin (Sigma), 8.4 ng/ml

250 cholera toxin (Wako), 10 ng/ml EGF (Wako), 24 µg/ml adenine (Sigma), 100 U/ml

251 penicillin, 100 µg/ml streptomycin (Gibco), and 10 µM Rho-kinase inhibitor Y27632

252 (Selleck)<sup>7</sup>).

253

254 **Isolation and culture of mouse adult subcutaneous mesenchymal cells (ASMCs)**

255 Subcutaneous groin-lumber fat pads were harvested from euthanized 3–5-week-old mice.

256 Briefly, adipose tissue was enzymatically digested (as described<sup>7</sup>) and subsequently the

257 stromal vascular fraction was isolated by centrifugation and inoculated on a gelatin-  
258 coated 6-well plate using one well for each mouse specimen, and maintained in complete  
259 DMEM growth medium, consisting of DMEM (containing 4.5 g/L glucose, 110 mg/L  
260 sodium pyruvate, and 4 mM L-glutamine) supplemented with 10% (v/v) heat-inactivated  
261 fetal bovine serum, 1:100 [v/v] MEM non-essential amino acid solution (Gibco), and  
262 1:100 [v/v] GlutaMAX supplement (Gibco).

263

264 **Isolation and culture of mouse neonatal skin epithelial cells (NSECs) and neonatal**  
265 **skin mesenchymal cells (NSMCs)**

266 Dorsal skin pieces were harvested from euthanized newborn mice (P0). Skin sheets were  
267 incubated with 0.25% trypsin and 0.02% EDTA for 16–24 hours at 4°C. In F medium, the  
268 epidermis was peeled off from the dermis using forceps. The resident epidermal cells  
269 were scraped from the dermis and epidermal cells and inoculated on mitomycin C-treated  
270 3T3-J2 feeder cells in F medium, while dermal tissue was cut into pieces using a razor  
271 blade, digested with collagenase, and inoculated with complete DMEM growth medium  
272 in a gelatin-coated 6-well plate using one well for each mouse specimen.

273

274 **Isolation and culture of mouse embryonic skin cells (ESKCs)**

275 After testing E12.5–E14.5 embryos, E14.5 was selected for use. Dorsal skin pieces were  
276 harvested from a euthanized mouse E14.5 embryo and incubated with 0.25% trypsin and  
277 0.02% EDTA for 16–24 hours at 4°C. The sample was cut into pieces using a razor blade,  
278 digested with collagenase, and inoculated with F medium in a gelatin-coated 6-well plate,  
279 using one well for each mouse specimen.

280

### 281 **Mouse iSEP generation**

282 Primary-culture ASMCs of more than two passages were seeded at 20,000 cells per well  
283 in 24-well culture plates. The next day, AAVs ( $1.0 \times 10^9$ – $10^{10}$ ) were mixed with complete  
284 DMEM medium. The medium was changed on days 1, 2, and 4. The medium was changed  
285 to F medium from day 4 or 5. The medium was changed daily. After the emergence of  
286 epithelial colonies, cells were passaged and maintained with the same protocols as ASECs.

287

### 288 **Culture of human dermal fibroblasts (hDFs)**

289 Normal human dermal fibroblasts (Cat. # C-12300) were purchased from PromoCell  
290 (Heidelberg, Germany) and maintained in complete DMEM growth medium.

291

### 292 **Retroviral plasmid construction**

293 pMX-DNP63A was used as the pMXs plasmid template<sup>7</sup>. Retroviral plasmids for  
294 candidate factors were prepared by subcloning the ORF template clones by PCR  
295 amplification with Prime STAR GXL DNA polymerase (Takara) and ligation by In-  
296 Fusion cloning enzyme (Clontech).

297

### 298 **Retrovirus production**

299 For retrovirus production, pMXs vectors were co-transfected with packaging plasmids  
300 (pCMV-gagpol-PA and pCMV-VSVg) into 293FT cells (Thermo Fisher Scientific) using  
301 Lipofectamine 2000 (Thermo Fisher Scientific). Retroviral supernatants were collected  
302 48 hours after transfection and debris was excluded by centrifugation twice for 20 minutes  
303 at  $2000 \times g$ .

304

### 305 **AAV plasmid construction**

306 AAV plasmids were prepared by subcloning the ORF to pAAV-CAG-DNP63A<sup>7</sup> or using  
307 the In-Fusion HD Cloning kit (Clontech).

308

### 309 **AAV production**

310 AAVs were prepared using 293AAV cells (Cell Biolabs, Inc.) by calcium phosphate

311 transfection followed by CsCl gradient purification, as described previously<sup>7</sup>. The virus  
312 titre was determined by qPCR using the primers ITR-F, 5' -  
313 GGAACCCCTAGTGATGGAGTT-3' and ITR-R, 5' -CGGCCTCAGTGAGCGA-  
314 3' .

315

### 316 **AAVDJ peptide display library**

317 The backbone plasmid for cloning the random oligonucleotides was generated from  
318 pAAV-CAG-GFP (Plasmid #37825, Addgene) and pAAVDJ using the In-Fusion HD  
319 Cloning kit (Clontech) and QuikChange II Site-Directed Mutagenesis Kit (Agilent), with  
320 reference to previous reports<sup>19,20</sup>. The first-round peptide display library plasmid was  
321 prepared using an *Sfi*I-digested backbone and a *Bgl*II-digested random-trimer  
322 oligonucleotide (Ella Biotech GmbH) using T4 DNA ligase (New England Biolabs). The  
323 AAVDJ peptide display library virus was produced by transfection of reduced library  
324 plasmid (1% (w/w)) with helper plasmids.

325

### 326 **qPCR analyses for dermal papilla markers**

327 Human DFs were seeded at 30%–40% confluency in 12-well culture plates. The next day,  
328 retroviral-containing supernatant (up to 40% of total medium) was mixed with complete

329 DMEM medium and polybrene at a final concentration of 8 µg/ml. The medium was  
330 changed on days 1 and 2. On day 4, total mRNA was purified (ZYMO Research, CA,  
331 R1058, Quick-RNA MINIprep plus), reverse transcribed (Thermo Fisher Scientific,  
332 M1662, Maxima™ H Minus cDNA Synthesis Master Mix), and analysed with qPCR  
333 (TOYOBO Bio, QPS-101, THUNDERBIRD® qPCR Mix) for *PROM1*, *CRABP1*, and  
334 *VCAN* using the following primers: *PROM1*-F, 5'-GGACCCATTGGCATTCTC-3' and  
335 *PROM1*-R, 5' -CAGGACACAGCATAGAATAATC-3' ; *CRABP1*-F, 5' -  
336 GCAGCAGCGAGAATTCGAC-3' and *CRABP1*-R, 5' -  
337 CGTGGTGGATGTCTTGATGTAGA-3' ; *VCAN*-F, 5' -  
338 GTAACCCATGCGCTACATAAAGT-3' and *VCAN*-R, 5' -  
339 GGCAAAGTAGGCATCGTTGAAA-3' ; and *GAPDH*-F, 5' -  
340 GGAGCGAGATCCCTCCAAAAT-3' and *GAPDH*-R, 5' -  
341 GGCTGTTGTCATACTTCTCATGG-3' .

342

### 343 **Alkaline phosphatase assay**

344 Four days after retroviral transfection to hDFs (as done for qPCR analyses), cells were  
345 fixed and stained using Stemgent® Alkaline Phosphatase Staining Kit II (Reprocell,  
346 Japan). The number of alkaline phosphatase (ALP)-positive cells in each well (24-well

347 plate) was manually counted or the central eye field (8.4 mm × 8.4 mm) was imaged using  
348 stereoscopy and analysed for positive cell counts using ImageJ.

349

### 350 ***In vivo* biopanning in ulcers**

351 The AAVDJ peptide display library virus was inoculated into an isolated skin ulcer in a  
352 silicone chamber. After 2–4 days, cells in the ulcer were isolated from tissues above the  
353 thoracic wall by collagenase digestion and inoculated on a gelatin-coated 6-well plate, as  
354 for ASMCs. After 2 days, genomic DNA was purified from cells using a DNeasy Blood  
355 & Tissue Kit (QIAGEN). Randomized capsid sequences were PCR amplified.  
356 *HindIII/NotI*-digested PCR reactant and backbone were ligated by T4 DNA ligase (New  
357 England Biolabs) and transformed to CloneCatcher™ (Genlantis) using ELEPO21  
358 (Nepagene). The next-round AAVDJ library was produced by transfection of a reduced  
359 library plasmid (1% (w/w)) with helper plasmids.

360

### 361 **AAVDJ capsid engineering**

362 Six *in vivo* biopanning cycles were applied for four series of animals. Twelve clones for  
363 each series were sequenced by Sanger sequencing. Amino acid sequences confirmed in  
364 two series of experiments were selected as expected variants, PCR amplified, and



365 subcloned to pAAVDJ. The *in vitro* gene transduction efficiency to ASMCs were  
366 evaluated for  $10^{10}$  (gene copies (GC) virus/well) GFPNLS (green fluorescent protein  
367 (GFP) with a nuclear localization signal (NLS))-expressing engineered AAVs in 24-well  
368 plates.

369

### 370 **Comparative analyses of AAVDJ and AAVDJU**

371 GFPNLS- and mCherry-expressing AAVDJ (original AAVDJ) virus and AAVDJU  
372 (engineered AAVDJ) virus were prepared. We inoculated 50  $\mu$ l of virus solution,  
373 including  $10^{11}$  GC of GFPNLS-expressing virus and  $10^{11}$  GC of mCherryNLS-expressing  
374 virus (i.e. AAVDJ-GFPNLS + AAVDJ-mCherryNLS, AAVDJU-GFPNLS + AAVDJU-  
375 mCherryNLS, AAVDJ-GFPNLS + AAVDJU-mCherryNLS, and AAVDJU-GFPNL +  
376 AAVDJ-mCherryNLS), to ulcers in silicone chambers attached on the interscapular area  
377 of mice (n = 5 for each group). Four days later, the top of the chamber was cut off and the  
378 ulcer surface was imaged using stereoscopy. The chamber and surrounding tissues were  
379 collected, fixed, and embedded in OCT compound. For each sample, sections (more than  
380 400  $\mu$ m apart) through the isolated skin ulcer were prepared and analysed to calculate the  
381 GFPNLS- and mCherryNLS-expressing cell frequency.

382

### 383 **Histological analyses of gene transduction efficiency**

384 With a guidance from the HE-stained serial section, the area of the DAPI-stained section  
385 was classified as the superficial layer (above the fascia of subcutaneous adipose tissue),  
386 the adipose layer (subcutaneous adipose tissue), and the muscle layer (striated muscle,  
387 such as trapezius muscle). To segment the nuclei in each layer, we generated UNet++  
388 models trained with the RMSprop optimizer and binary cross-entropy dice coefficient  
389 loss (BCE-dice-loss). The images for generating the training data were cropped to  $512 \times$   
390  $512$  pixels and subjected to model training with 400 epochs, a batch size of 8, and a  
391 learning rate of  $10^{-4}$ . After the training, the model was applied to all the images to predict  
392 the nuclear area, and the probability of each pixel was calculated in the range of [0, 1].  
393 Pixels with probabilities in the range of [0.5, 1] were annotated as nuclei, and then the  
394 nuclear regions were segmented using the watershed algorithm. Nuclei with more than 5  
395 GFP-positive pixels were defined as nuclei from AAV-infected cells. The numbers of  
396 AAV-infected nuclei were counted for each region and layer. For each sample, 10–16  
397 sections (mean, 14.4) were analysed.

398

### 399 **Skin reconstitution assay**

400 BALB/cAJcl-nu/nu female mice were used as recipient animals. Under inhalation

401 anaesthesia, a 6-mm circular piece of skin was removed from the interscapular area. An  
402 autoclaved 1.0-cm diameter silicone chamber, generated using a 3D printed template<sup>11</sup>,  
403 was inserted into the skin hole. Four 5-0 nylon sutures were made to attach the rim of the  
404 silicone chamber to the skin. Epithelial cells and mesenchymal cells (1–6 wells in a 6-  
405 well plate), for investigation of the skin appendage regeneration ability, were prepared in  
406 150  $\mu$ l 1:1 (v/v) mixtures of keratinocyte F medium and complete DMEM growth  
407 medium and transferred into the chamber via a small incision made at the top of the  
408 chamber. On day 7, the upper half of the chamber was cut off. On day 14, the chamber  
409 was removed. The regeneration of skin appendages was evaluated on day 28.

410

#### 411 **Assay for identification of reprogramming factors**

412 Epithelial cells to be assessed for skin appendage regeneration ability were transplanted  
413 after purification by cultivation with NMSCs passaged more than twice (early passage  
414 NMSCs include NSECs, resulting in false-positive skin appendage regeneration).  
415 Mesenchymal cells to be assessed were transplanted with DGTML-iSEPs 4–8 days after  
416 the transduction of retroviral candidate genes.

417

#### 418 ***In vivo* skin regeneration assay**

419 To evaluate the *de novo* generation of skin with appendages from the bottom of cutaneous  
420 ulcers, we aimed to induce epithelial tissues in skin ulcers that were isolated from the  
421 surrounding skin by a skin chamber in female C57BL/6JJcl mice. To avoid subcutaneous  
422 glands, such as the thyroid and mammary glands, the interscapular area was chosen as the  
423 optimal site for chamber attachment. Chambers were made by cutting 0.6-ml low-  
424 attachment microtubes (BM4006 from BM Bio). The lateral surface of the tubes was  
425 covered by a silicon tube with an external diameter of 6 mm and an internal diameter of  
426 5 mm for suture fixation. Under inhalation anaesthesia, the chamber attachment site was  
427 shaved and sterilized. From a 1.5 cm vertical incision on the spine, a flap was elevated  
428 beneath the panniculus carnosus, and the chamber was sutured down to the deep fascia  
429 with six horizontal mattress sutures and sutured to the surrounding skin flaps to ensure  
430 fixation/sealing of the chamber using 4-0 Ethilon (Ethicon Inc.). Then, AAVs were  
431 administered and the lid was closed. The edge of the skin flap was glued to the chamber  
432 when necessary.

433

#### 434 **Animals**

435 C57BL/6JJcl and BALB/cAJcl-nu/nu mice were purchased from Nippon Bio-Supp.  
436 Center. C57BL/6-Tg(CAG-EGFP) and C57BL/6-BALB/c-nu/nu-EGFP mice were

437 purchased from Japan SLC, Inc. Mice of both genders were used unless otherwise  
438 indicated. All animal procedures were approved by the IACUC of the Graduate School  
439 of Medicine and Faculty of Medicine, The University of Tokyo.

440

#### 441 **Histological analyses**

442 For frozen sectioning, samples were fixed using 4% paraformaldehyde in PBS, then  
443 incubated in 30% sucrose in PBS for 1–2 days. Tissues were embedded in OCT compound  
444 and were frozen using dry ice. Tissue sections were routinely stained with haematoxylin  
445 and eosin. Immunohistochemical analyses were performed using antibodies against  
446 Cytokeratin 14 (ab181595, 1:500; Abcam). Secondary antibodies were obtained from  
447 Life Technologies. After staining, sections were mounted with DAPI Fluoromount-G  
448 (Southern Biotech). Sections processed for confirmation of the cell contribution to  
449 regenerated skin appendages were first stained with BCIP®/NBT solution (Sigma B6404)  
450 and DAPI (Dojindo D523, Kumamoto, Japan, 1:1,000), analysed, then stained with  
451 haematoxylin and eosin and re-analysed. Sections analysed for *in vivo* generation of skin  
452 appendages were immunohistochemically analysed first, then stained with haematoxylin  
453 and eosin and re-analysed.

454

455 **Imaging analyses**

456 Imaging analyses were performed using a Confocal Zeiss LSM900, a Stereoscope Zeiss  
457 AXIO Zoom.V16, an Olympus VS-200 Slide Scanner, an Olympus IX73 Inverted LED  
458 Fluorescence Microscope, and a high-resolution operative microscope Mitaka Kohki  
459 MM100-YOH.

460

461 **Statistical analysis**

462 No statistical methods were used to predetermine sample size. The experiments were not  
463 randomized, and the investigators were not blinded to allocation during experiments and  
464 outcome assessment.

465

466 **Reporting summary**

467 Further information on research design is available in the Nature Research Reporting  
468 Summary linked to this paper.

469

470 **Acknowledgements**

471 This work was supported by JSPS KAKENHI Grant numbers JP20H03847 (to M. K.);  
472 JP20K20609 (to M. K.); 19H03813 (to M. O.); 22H03247 (to M. O.); AMED under Grant

473 Numbers JP20bm0704031 (to M. K.); and JP21zf0127002 (to M. K. and H. H.). We thank  
474 Catherine Perfect, MA (Cantab), from Edanz (<https://jp.edanz.com/ac>), for editing a draft  
475 of this manuscript.

476

#### 477 **Author Contributions**

478 M. Ku. conceived the project. M. Ku. planned the experiments. Y. M., S. Q., D. Z., M.  
479 Ka., T. N., K. L., K. K., and M. Ku. performed the experiments. H. O., S. S., K. K., Y. H.,  
480 H. H., and M. Ku. analysed the results, and M. O., J. C. I. B., and M. Ku. wrote the  
481 manuscript with editing by all the other authors.

482

#### 483 **Competing Interest Declaration**

484 The authors declare no competing interests.

485

486

487

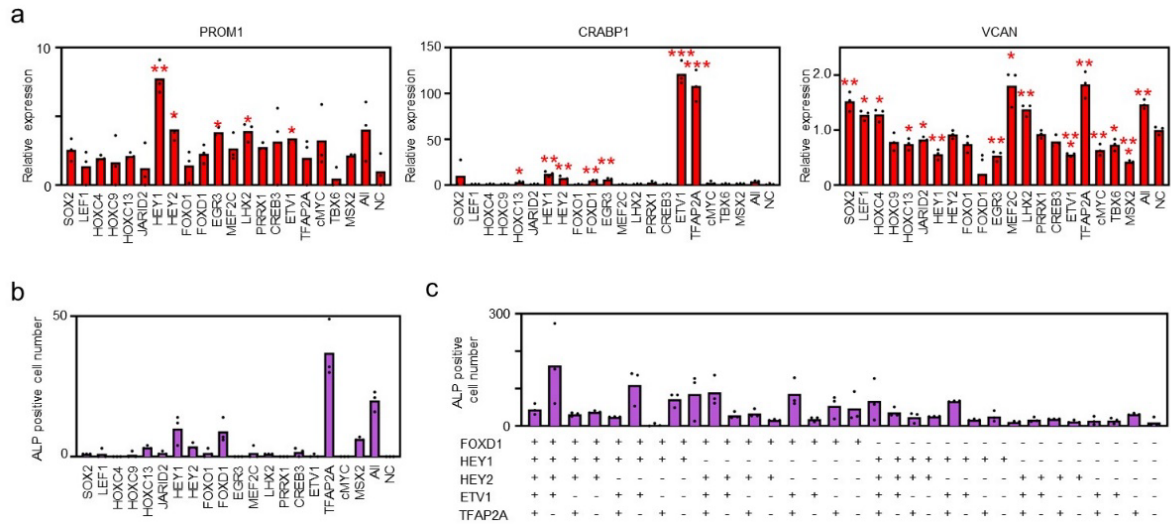

488

489 **Extended Data Fig. 1. a,** Changes in expression levels of the dermal papilla markers *PROM1*, *CRABP1*, and *VCAN* after candidate

490 gene transduction as assessed by quantitative PCR. **b,** Number of alkaline phosphatase (ALP)-positive cells in each well (24-well plate)

491 four days after candidate gene transduction. Overlaid dot plots indicate the distribution of the data (n = 3, technical replicates). **c,** Number

492 of ALP-positive cells in the central field of 24 wells after candidate gene transduction. Overlaid dot plots indicate the distribution of the data

493 (n = 3, technical replicates).



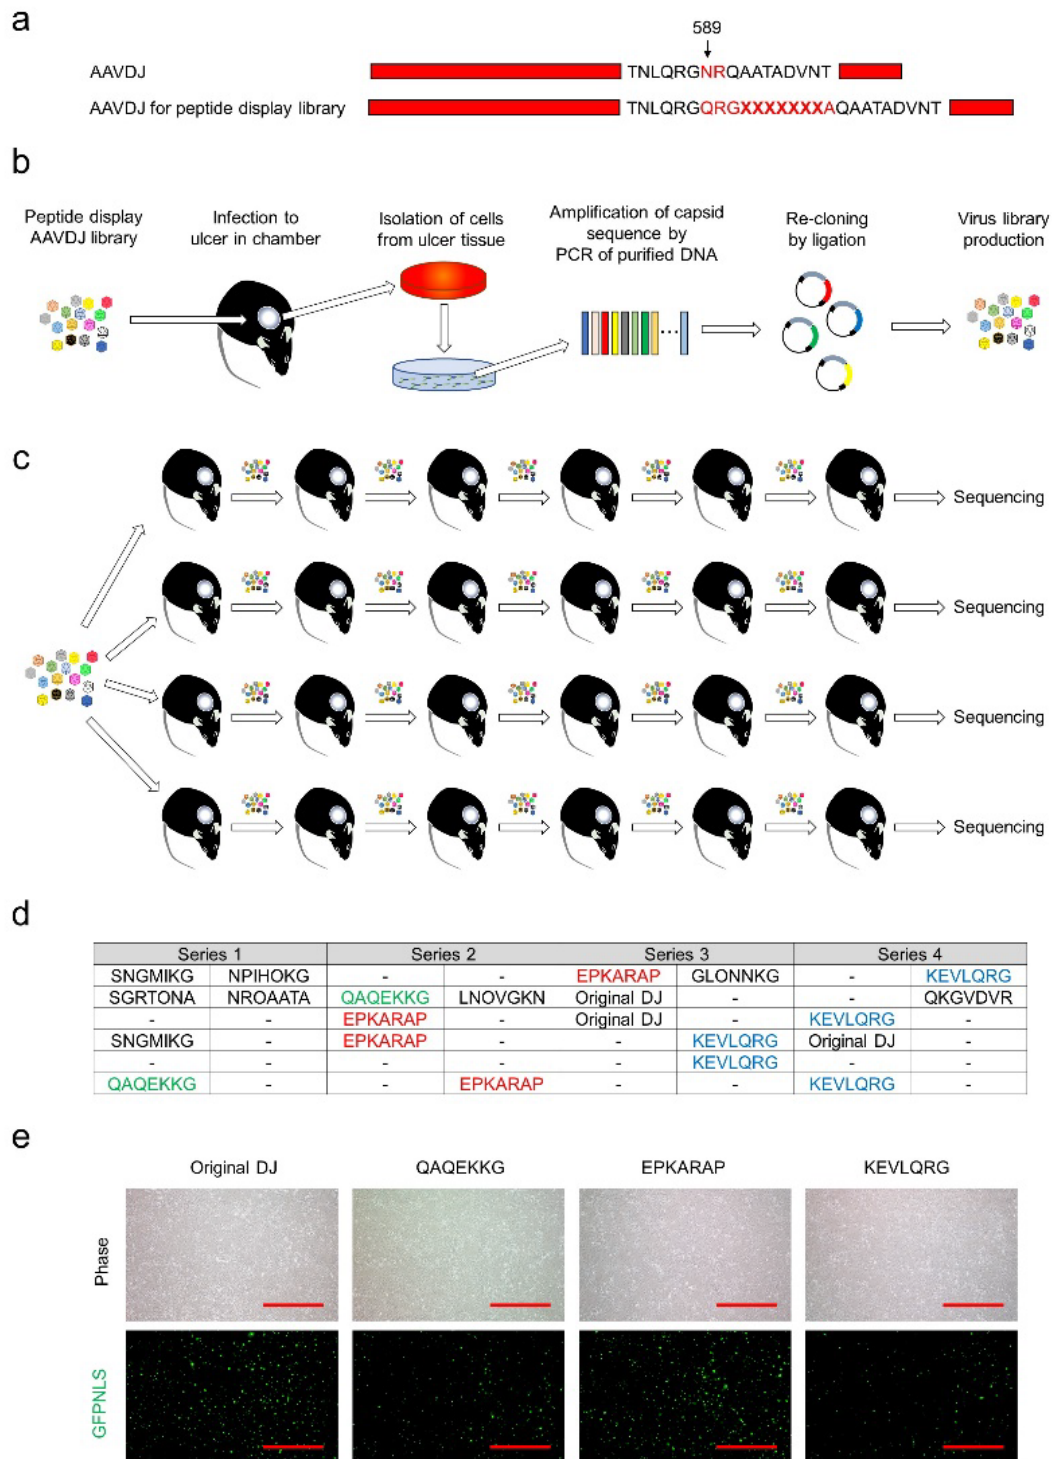

494

495 **Extended Data Fig. 2: Development of an AAVDJ-variant capsid optimized for cells in murine isolated skin ulcers.**

496 **a**, Schematics of the AAVDJ peptide display library. The library was generated by mutagenesis of AAVDJ at the 589<sup>th</sup> amino acid position.

497 X, randomized amino acid. **b**, Schematics of the *in vivo* biopanning cycle. A library virus was inoculated in an isolated skin ulcer in a  
498 chamber. After 2–4 days, cells were isolated from the ulcer tissue. After two days, genomic DNA was purified from the cells. Randomized  
499 capsid sequences were PCR amplified and subcloned to a backbone vector. The next-cycle virus library was generated. **c**, Schematics of  
500 capsid engineering. Six *in vivo* biopanning cycles were applied for four series of animals. **d**, Randomized amino acid sequences detected  
501 by sequencing of 12 clones for each series. (-) indicates the sample was unreadable. Amino acid sequences highlighted in red, blue, and  
502 green were sequenced in two series of experiments and rendered for *in vitro* gene transduction analysis. **e**, Findings of ASMCs four days  
503 after infection with GFPNLS (green fluorescent protein (GFP) with a nuclear localization signal (NLS))-expressing original DJ virus and the  
504 DJ-variant virus harnessing selected amino acid sequences. The DJ variant with EPKARAP was more efficient than other two variants and  
505 thus was employed as a new AAVDJ-variant capsid optimized for cells in murine isolated skin ulcers (AAVDJU). Scale bar = 500  $\mu$ m.

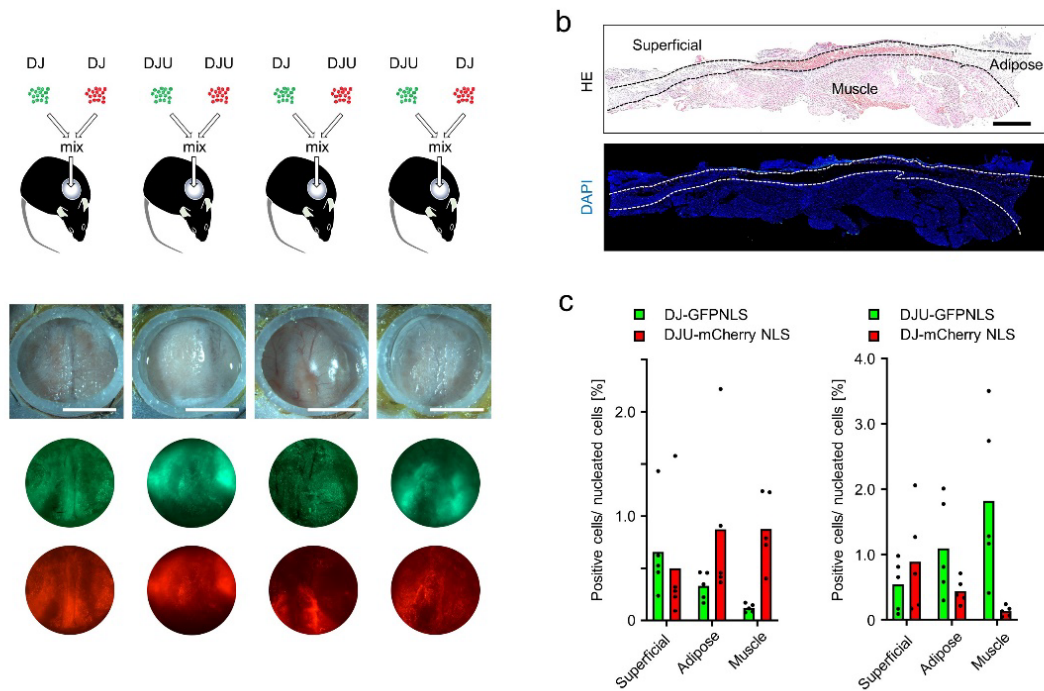

506

507 **Extended Data Fig 3: AAVDJU is superior to AAVDJ for cells in the deep layer of a murine isolated skin ulcer. a,**

508 (top) Schematics of comparative analyses of the gene transduction efficiency of AAVDJ and AAVDJU. AAVDJ-GFPNLS, AAVDJ-

509 mCherryNLS, AAVDJ-GFPNLS, and AAVDJ-mCherryNLS were prepared, mixed, and inoculated in isolated ulcers (n = 5 for each condition).

510 (2<sup>nd</sup> row) Stereoscope images of representative animals four days after inoculation with AAVs. (3<sup>rd</sup> and 4<sup>th</sup> row) Stereoscope fluorescence

511 images of the ulcer surface. The fluorescence expression patterns from the same capsid, such as AAVDJ-GFPNLS and AAVDJ-

512 mCherryNLS, were similar, while those from different capsids were different. Samples were collected and rendered for histological analyses.

513 Scale bar = 5 mm. **b**, Haematoxylin and eosin (H&E) staining and fluorescent images of a section through an isolated skin ulcer. The gene

514 transduction efficiencies were analysed in fluorescent images for three tissue layers (superficial, adipose, and muscle) demarcated by

515 neighbouring H&E images. Scale bar = 10 mm. **c**, Frequency of nuclear-fluorescent-signal-positive cells in each layer of tissue in animals

516 to which AAVDJ-GFPNLS plus AAVDJU-mCherryNLS (n = 5) and AAVDJU-GFPNLS plus AAVDJ-mCherryNLS (n = 5) were delivered,

517      respectively, histologically quantified by deep-learning assisted imaging analyses. In both groups of animals, AAVDJU was more efficient

518      than AAVDJ in the adipose and muscle layers.
